# Supplementary material for: A Radiomics Approach on Chest CT Distinguishes Primary Lung Cancer from Solitary Lung Metastasis in Colorectal Cancer Patients
Source: MDPI journal article supplement (doi:10.3390/jpm12111859), 2022-11-07
Supplement: s1 [file s1]

Supplementary Table S1. The list of the radiomic features that were selected for the SVM classifier and their ICC results.

| Radiomic features                         | Feature type | Primary LC  | Solitary LM | <i>P</i> value <sup>†</sup> | Inter-reader ICC*    |
|-------------------------------------------|--------------|-------------|-------------|-----------------------------|----------------------|
| <b>Intranodular radiomic feature</b>      |              |             |             |                             |                      |
| Sphericity                                | Shape        | 0.63 ± 0.08 | 0.73 ± 0.06 | <0.001                      | 0.852 (0.798, 0.892) |
| GLCM Correlation                          | Texture      | 0.26 ± 0.16 | 0.09 ± 0.16 | <0.001                      | 0.874 (0.828, 0.908) |
| GLDM Dependence Entropy                   | Texture      | 6.56 ± 0.39 | 6.16 ± 0.38 | <0.001                      | 0.936 (0.912, 0.953) |
| <b>Perinodular radiomic feature</b>       |              |             |             |                             |                      |
| GLDM Dependence Non-Uniformity Normalized | Texture      | 0.23 ± 0.06 | 0.21 ± 0.04 | 0.009                       | 0.899 (0.861, 0.926) |

Note: Values are presented as mean ± standard deviation where applicable. SVM, support vector machine; ICC, intraclass correlation coefficient; GLCM, grey level co-occurrence matrix; GLDM, gray level dependence matrix.

<sup>†</sup>*P* values are for comparisons between primary LC and solitary LM.

\*Values in parentheses are 95% confidence intervals.

Supplementary Table S2. Semantic CT imaging features of solitary pulmonary nodules in the training, internal, and external testing datas.

|                        | Training<br>( <i>n</i> =159) | Internal testing<br>( <i>n</i> =40) | External testing<br>( <i>n</i> =40) | <i>P</i> value     |
|------------------------|------------------------------|-------------------------------------|-------------------------------------|--------------------|
| <b>Size (mm)</b>       | 17.2 ± 7.0                   | 17.0 ± 9.6                          | 16.0 ± 7.0                          | 0.628              |
| <b>Margin</b>          |                              |                                     |                                     | 0.259              |
| Smooth                 | 53 (33.3)                    | 14 (35.0)                           | 20 (50.0)                           |                    |
| Lobulated              | 72 (45.3)                    | 20 (50.0)                           | 12 (30.0)                           |                    |
| Spiculated             | 34 (21.4)                    | 6 (15.0)                            | 8 (20.0)                            |                    |
| <b>Density</b>         |                              |                                     |                                     | 0.221              |
| Solid                  | 138 (87.4)                   | 38 (95.0)                           | 33 (82.5)                           |                    |
| Subsolid               | 20 (12.6)                    | 2 (5.0)                             | 7 (17.5)                            |                    |
| <b>Air-bronchogram</b> |                              |                                     |                                     | <b>0.043*</b>      |
| Absent                 | 126 (79.2)                   | 38 (95.0)                           | 35 (87.5)                           |                    |
| Present                | 33 (20.8)                    | 2 (5.0)                             | 5 (12.5)                            |                    |
| <b>Cavitation</b>      |                              |                                     |                                     | <b>&lt;0.001**</b> |
| Absent                 | 146 (91.8)                   | 28 (70.0)                           | 33 (82.5)                           |                    |
| Present                | 13 (8.2)                     | 12 (30.0)                           | 7 (17.5)                            |                    |
| <b>Pleural tag</b>     |                              |                                     |                                     | 0.631              |
| Absent                 | 106 (66.7)                   | 29 (72.5)                           | 25 (62.5)                           |                    |
| Present                | 53 (33.3)                    | 11 (27.5)                           | 15 (37.5)                           |                    |

Note: Values in parentheses are percentages. Values are presented as mean ± standard deviation where applicable.

Significant *P* values are in bold. SPN, solitary pulmonary nodule

\*Post-hoc analysis was performed to compare the proportion of SPNs with air-bronchogram between the three datas, the proportion of SPNs with air-bronchogram was significantly higher in the training data than in the internal testing data.

---

\*\*Post-hoc analysis was performed to compare the proportion of SPNs with cavitation between the three datas, the proportion of SPNs with cavitation was significantly higher in the internal testing data than in the training data.
